# 1 Multi-site enzymes as a mechanism for bistability in reaction networks

2

3 Clarmyra Hayes<sup>1-3</sup>, Elisenda Feliu<sup>4,\*</sup>, and Orkun S Soyer<sup>1-3,\*</sup>

4

5 **Affiliations:** <sup>1</sup>School of Life Sciences, <sup>2</sup>Synthetic Biology Doctoral Training Centre; <sup>3</sup>Warwick  
6 Integrative Synthetic Biology Centre (WISB); University of Warwick, Coventry, CV4 7AL,  
7 UK. <sup>4</sup>Department of Mathematics, University of Copenhagen, Copenhagen, Denmark.

8

9 **\*Corresponding Authors:** Elisenda Feliu, Department of Mathematics, University of  
10 Copenhagen, DK-2100 Copenhagen, Denmark, +45 35320794, [efeliu@math.ku.dk](mailto:efeliu@math.ku.dk). Orkun S  
11 Soyer, University of Warwick, Coventry, CV4 7AL, UK, + 44 (0)24 7657 4251,  
12 [o.soyer@warwick.ac.uk](mailto:o.soyer@warwick.ac.uk).

13

14 **Keywords:** Reaction system dynamics, synthetic biology, phenotypic heterogeneity,  
15 multistability, substrate inhibition, enzyme kinetics, protein engineering.

16

17 **Authors contributions:** CH and OSS have devised the study. CH, OSS, and EF performed  
18 analyses and simulations, interpreted the results, and wrote the manuscript.

19

## 20 ABSTRACT

21 Here, we focus on a common class of enzymes that have multiple substrate-binding sites  
22 (multi-site enzymes), and analyse their capacity to generate bistable dynamics in the reaction  
23 systems that they are embedded in. Using mathematical techniques, we show that the inherent  
24 binding and catalysis reactions arising from multiple substrate-enzyme complexes creates a  
25 potential for bistable dynamics in a reaction system. We construct a generic model of an  
26 enzyme with  $n$  substrate binding sites and derive an analytical solution for the steady state  
27 concentration of all enzyme-substrate complexes. By studying these expressions, we obtain a  
28 mechanistic understanding for bistability and derive parameter combinations that guarantee  
29 bistability and show how changing specific enzyme kinetic parameters and enzyme levels can  
30 lead to bistability in reaction systems involving multi-site enzymes. Thus, the presented  
31 findings provide a biochemical and mathematical basis for predicting and engineering  
32 bistability in multi-site enzymes.

33

## 34 INTRODUCTION

35 Cellular reaction networks enable cells to remain out of thermodynamic equilibrium and to  
36 respond to external cues. The dynamics of these networks enable cellular homeostasis and  
37 decision making (1,2). Many decision-making processes involve so-called bistable dynamics,  
38 in which a system can attain two different steady states depending on initial conditions.  
39 Bistability is implicated in many cellular decision processes, including the cell cycle control  
40 (3), lysis-lysogeny decision (4), metabolic shifting (5-7), and persister formation (8).

41

42 Manifestation of bistability requires some mechanism of feedback (9, 10). In the case of  
43 enzymatic reaction systems, feedback dynamics can arise from transcriptional, or substrate- or  
44 product-based regulation, or via post-translational modification of enzymes. Several models  
45 implementing these types of enzyme regulation are shown to display bistability and are used  
46 to explain different cellular responses (2, 5, 6, 11-13). In the case of substrate- and product-  
47 based regulation of enzymes, a commonly used model considers an enzyme with two binding

48 sites, where binding of substrate at one side leads to catalysis, while binding of the substrate or  
49 product on the other site alters catalytic rate. In such a two-site enzyme model, both bistability  
50 and oscillations are attainable depending on the specific binding mechanisms and the assumed  
51 functional forms of the rate equations (2, 11, 14-15). Despite this wide application of the two-  
52 site enzyme model, it is currently not clear how exactly a multi-site enzyme facilitates  
53 bistability and under which parameter regions and biochemical conditions it does so. This is a  
54 relevant question, considering that many enzymes found in central metabolism and signalling  
55 pathways are multimers comprising multiple substrate binding sites (16). Specific examples  
56 include dehydrogenases with key metabolic substrates (e.g. phosphoglycerate, malate and  
57 lactate) and commonly composed of dimers or tetramers with multiple binding sites (17), and  
58 kinases such as phosphofructokinase, which have multiple active binding sites (18). A better  
59 understanding of reaction dynamics of multi-site enzymes can allow us to predict which  
60 naturally existing enzymes might be implementing bistability for cellular decision making or  
61 might be suited for engineering of bistability through synthetic biology.

62  
63 Here, we undertake an extensive theoretical study of a generalised model of an enzyme with  $n$   
64 substrate binding sites, in order to derive both a biochemical intuition and a set of mathematical  
65 conditions on kinetic parameters for bistability. We use primarily analytical approaches to  
66 show that the multi-site nature of an enzyme inherently results in a potential for bistability. We  
67 then use this insight to derive conditions on the kinetic rate parameters of simple reaction  
68 networks with multi-site enzymes, that guarantee bistability for some concentration of substrate  
69 and enzyme. These findings allow us to predict and outline enzyme engineering strategies that  
70 can be employed to achieve bistability in simple reaction networks.

## 71 72 **RESULTS**

73 To better understand how a multi-site enzyme can lead to bistability, we first create a generic  
74 model of substrate ( $S$ ) to product ( $P$ ) conversion mediated by an enzyme ( $E$ ) that has  $n$ -substrate  
75 binding sites (Fig. 1A). In this initial model, we assume that the total concentration of substrate  
76 and product, and the total concentration of free and substrate-bound enzyme are conserved (see  
77 *Methods* and *Supplementary Information (SI)*). The former assumption is directly applicable  
78 when the substrate is a conserved moiety, such as enzyme co-factors or energy and reducing  
79 power equivalents (e.g. ATP-ADP and NADH-NAD<sup>+</sup> pairs) (2, 19). This assumption is useful  
80 to illustrate our results, and relaxing it – as discussed below - show that our main conclusions  
81 remain intact for the cases where substrate concentration is freely changing (e.g. through fluxes  
82 by other reactions). The latter assumption of total enzyme concentration being conserved  
83 reflects the fact that the time scales of enzyme expression are in most cases slower compared  
84 to reaction dynamics.

85  
86 To make the model as generic as possible, we use mass-action kinetics with irreversible  
87 enzymatic catalysis, and consider substrate molecules binding to the enzyme in any order and  
88 also irrespective of how many substrates are already bound. As we show in the *SI*, more  
89 restricted assumptions about substrate binding order or affinity, do not alter our main  
90 conclusions. To exemplify our modelling approach, in the *Methods* section, we provide the set  
91 of reactions arising from the generic model for a 2-site enzyme, i.e.  $n = 2$  (see also Fig. 1B).  
92 For our general  $n$ -site model, the full set of reactions can be formally written as:

93

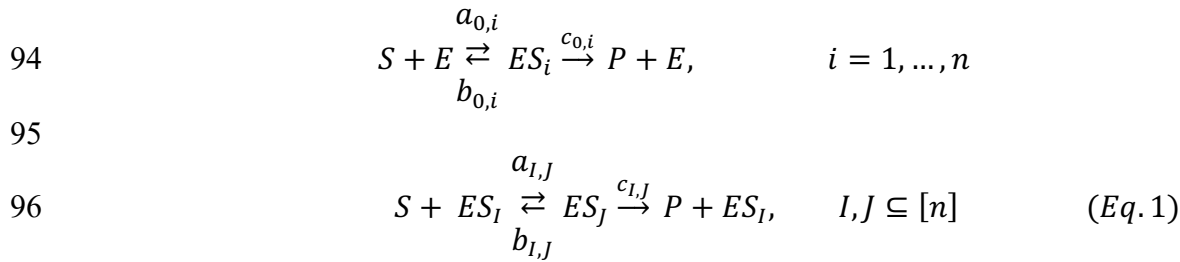

98 where  $a$ ,  $b$  and  $c$  are kinetic rate constants associated with the individual substrate binding sites  
 99  $i$ , which are numbered 1 through  $n$ . The set  $[n]$  is the complete set of binding sites  $[n]=\{1, \dots,$   
 100  $n\}$ , and  $ES_I$  and  $ES_J$  are enzyme complexes in which a given number of substrate molecules are  
 101 bound respectively to a set of sites  $I$  and  $J$ . In other words,  $I$  and  $J$  are sets with *any* number of  
 102 elements from the list of sites 1 through to  $n$ ; ( $I, J \subseteq [n]$ ). For example, for  $I = \{1,3,4\}$ ,  $ES_I$  is  
 103 the enzyme complex where the sites numbered 1, 3, 4 are bound to substrate molecules (Fig.  
 104 1A). Additionally,  $ES_J$  is formed by the binding of a single, additional substrate molecule to  
 105  $ES_I$ , meaning the difference between the sets of  $I$  and  $J$  in Eq. 1 is one element. Note also that  
 106 the system defined by Eq. 1, results in  $2^n-1$  enzyme complexes (Fig. 1A).

107  
 108 **Fully-bound and non-fully-bound enzyme complexes display distinct steady state**  
 109 **dynamics with increasing substrate concentration.** We analysed the above generic model  
 110 using analytical methods to derive solutions for the steady state concentrations of all  $2^n - 1$   
 111 enzyme complexes, as functions of the steady state concentration of substrate ( $[S]$ ) (see *SI* for  
 112 details). We found that the steady state concentration of any complex ( $ES_I$ ) is given by:

$$\begin{aligned}
 & 114 \quad [ES_I] = \frac{E_{tot} \sum_{l=|I|}^{M+|I|} \alpha_{I,l} [S]^l}{\sum_{J \subseteq [n]} \sum_{l=|J|}^{M+|J|} \alpha_{J,l} [S]^l} \quad (Eq. 2) \\
 & 115
 \end{aligned}$$

116 Here,  $E_{tot}$  is the total enzyme concentration including both free and bound forms of the enzyme,  
 117 and  $M = 2^n - 1 - n$ . The terms  $|I|$  and  $|J|$  are the number of elements (i.e bound sites) in a given  
 118 complex, and thus, the index  $l$ , which also appears as an exponent to  $[S]$ , is over the number of  
 119 bound substrates. The terms  $\alpha_{I,l}$  and  $\alpha_{J,l}$  indicate a positive function of the kinetic reaction  
 120 constants associated with each of the enzyme complexes (see *SI* for details and *Methods* for an  
 121 example with  $n = 2$ ). We note that Eq. 2 is derived under the most generic case of substrates  
 122 binding to different enzyme sites in any order, however, we show that Eq. 2 remains true if we  
 123 assume more specific binding processes, e.g. binding at a specific enzyme site requiring other  
 124 sites to be bound with substrate (see *SI*, Section 1.1 for details). In such cases, some of  $\alpha_{I,l}$  and  
 125  $\alpha_{J,l}$  might be zero.

126  
 127 A close inspection of Eq. 2 shows that  $[ES_I]$  will always be given by a fraction of two  
 128 polynomials in  $[S]$ . These polynomials will differ in their degree in  $[S]$  unless  $I$  is equal to the  
 129 full set (i.e.  $I=[n]$ ). This is because, when  $I \neq [n]$ , the summations in the denominator and the  
 130 numerator in Eq. 2 are over different numbers of bound substrates. Specifically, the summation  
 131 in the denominator is over all enzyme complexes and the largest degree of this polynomial will  
 132 be equal to  $M + n = 2^n - 1$ , the total number of enzyme complexes. In contrast, the summation  
 133 in the numerator is over the enzyme complexes that can be generated from the enzyme complex  
 134  $ES_I$ . If  $ES_I$  is the fully-bound enzyme complex, then the degree of the numerator will be equal  
 135 to that of the denominator, as the largest possible value of the index  $l$  would be  $M + |I| = 2^n -$

136 1. If  $ES_I$  is not the fully-bound complex, then the degree of the numerator will be equal to that  
137 of the denominator minus the number of empty binding sites in  $ES_I$ . For instance, if the enzyme  
138 has two substrate binding sites, leading to three potential different enzyme complexes, the  
139 degree of the polynomial in the denominator will be three (Fig. 1B and C). The polynomial in  
140 the numerator would have a degree of three for the fully bound complex, while for the two  
141 complexes, consisting of one filled and one empty binding site, it would have a degree of two  
142 (Fig. 1B and C).

143  
144 The specific structure of Eq. 2 provides an insight to the behaviour of steady state  
145 concentrations of the different enzyme complexes with increasing  $[S]$  (Fig. 1C). Considering  
146 the fact that the polynomials comprising Eq. 2 have positive coefficients (given by  $\alpha_{i,l}$  and  $\alpha_{j,l}$ ,  
147 which are functions of kinetic rates), the steady state concentration of all enzyme complexes  
148 will initially increase from zero with increasing  $[S]$ . Since Eq. 2 for the fully-bound complex  
149 has polynomials of the same degree in the numerator and denominator, the limit value of Eq.  
150 2 at very high  $[S]$  for this complex will be the ratio of the coefficients of the highest degree  
151 terms of the numerator and denominator. We show that this ratio is equal to  $E_{tot}$ , the total  
152 enzyme concentration in the network (see *SI*, Theorem 1). Thus, for the fully-bound enzyme  
153 complex the steady state concentration will initially increase with increasing  $[S]$  and approach  
154 finally a positive value given by  $E_{tot}$  (Fig. 1C, last panel). In the case of the non-fully-bound  
155 enzyme complexes, Eq. 2 will have a lower degree polynomial in the numerator than the  
156 denominator, and therefore, its limit value at very high  $[S]$  will approach zero. Thus, for the  
157 non-fully-bound enzyme complexes their steady state concentration will initially increase with  
158 increasing  $[S]$ , show at least one peak, and then approach towards zero from above (Fig. 1C,  
159 first two panels).

160  
161 Note that, while Fig. 1C shows the behaviour of Eq. 2 for an enzyme with  $n = 2$ , the analytical  
162 summary presented here is independent of  $n$ . It shows that, for a multi-site enzyme, we will  
163 always have two distinct, and qualitatively different curves describing the different enzyme  
164 complexes' steady state concentrations (as exemplified in Fig. 1C). From here on, we refer to  
165 these two qualitatively distinct types of curves as 'positive' and 'negative' type, respectively.  
166 Both positive and negative type curves will increase when  $[S]$  is small and increasing. At large  
167 values of  $[S]$ , both curves will approach a limit value, with positive type curve approaching its  
168 limit from below and a negative type curve approaching its limit from above (Fig. 1C). These  
169 overall conclusions for curve shapes against small and large values of  $[S]$  are independent of  
170 the specific values of the kinetic rate parameters. They arise solely because of the polynomial  
171 degree structure of Eq. 2, in other words, from the multi-site structure of the enzyme.

172  
173 The exact shape of the curves for intermediate, increasing values of  $[S]$ , however, and in  
174 particular the number of peaks they will display before approaching the limit value, will depend  
175 on the catalytic and Michaelis-Menten ( $K_m$ 's) rate constants of the individual enzyme-substrate  
176 complexes (i.e the functions  $\alpha_{i,l}$  and  $\alpha_{j,l}$  in Eq. 2). For an enzyme with  $n = 2$ , the negative type  
177 curves (of the single substrate complexes) will always show a single peak and have one  
178 inflection point (see *SI*, Section 1.1). The positive type curve (of the fully-bound, two substrate  
179 complex) mostly shows no peaks and is a steady increasing function of  $[S]$ , but there are kinetic  
180 parameters for which it would display peaks, as we discuss below (see *SI*, Section 2.4). With  
181 higher  $n$ , both the negative and positive type curves can readily display multiple peaks.  
182 Intuitively, and from a biochemical perspective, the positive type curve can be thought of as a  
183 saturation process, in which increasing  $[S]$  pushes more enzyme binding sites to be filled,  
184 ultimately leading to an increase of the steady state concentration of the fully-bound enzyme

185 complex. Correspondingly, the steady state concentrations of the non-fully-bound enzyme  
186 complexes decrease with increasing  $[S]$ , giving rise to the negative type curve.

187  
188 **The negative type curves of non-fully-bound enzyme complexes underpin the potential**  
189 **for bistability.** We now consider the catalytic flux through each enzyme complex. We refer to  
190 the catalytic flux through complex  $ES_I$ , as  $V_{ES_I}^{S \rightarrow P}$ , and note that its steady state value will be a  
191 function of the steady state complex concentration,  $[ES_I]$ . Furthermore, the total catalytic flux  
192 through the enzyme,  $V_{S \rightarrow P}$ , will be given by the sum of the individual fluxes through each of  
193 its complexes. By the analysis above,  $V_{S \rightarrow P}$  tends to  $E_{tot}$ , times the sum of the catalytic rate  
194 constants of the fully-bound complex. To illustrate the ideas for general  $n$ , we consider first the  
195 example case for an enzyme with  $n = 2$  (shown in Fig. 1B and 1C). It is easier to graphically  
196 understand how bistability arises in this system if we analyse the behaviour of the catalytic  
197 fluxes against  $[S_{sum}] = S_{tot} - [P]$ , where  $S_{tot}$  is a constant describing the combined amount of  
198 product and free and bound substrate (see *SI*, Section 1.1). As we show in the *SI*, for  $n = 2$ ,  
199  $[S_{sum}]$  is an increasing function of  $[S]$  and hence, the qualitative behaviour of  $V_{S \rightarrow P}$  against  
200 increasing  $[S]$  or  $[S_{sum}]$  is the same.

201  
202 In Fig. 2, we show  $V_{ES_I}^{S \rightarrow P}$  against  $[S_{sum}]$  for two different parameter sets, and as expected, we see  
203 that the behaviour of  $V_{ES_I}^{S \rightarrow P}$  against  $[S_{sum}]$  qualitatively follows that of  $[ES_I]$  against  $[S]$  as given  
204 by Eq. 2 and shown in Fig. 1. In the example shown in Fig. 2A, where we have the same  
205 parameters as in Fig. 1C, the total catalytic flux  $V_{S \rightarrow P}$  is dominated by the fluxes through the  
206 non-fully-bound complexes, and as such,  $V_{S \rightarrow P}$  displays a negative type behaviour in  $[S_{sum}]$ . In  
207 Fig. 2B, we see the results for a second set of parameters, where  $V_{S \rightarrow P}$  is dominated by the flux  
208 through the fully-bound complex, and as a result, it displays a positive type curve in  $[S_{sum}]$ . As  
209 illustrated by these examples, which type of behaviour  $V_{S \rightarrow P}$  displays will depend on the  
210 specific values of the catalytic and Michaelis-Menten ( $K_m$ 's) rate constants of the individual  
211 enzyme complexes.

212  
213 We now consider the shape of the  $V_{S \rightarrow P}$  curve in the context of a reaction system. To start with,  
214 we consider a simple scenario, involving a back reaction from product to substrate, creating a  
215 reaction cycle (see Fig. 2C). We initially assume that the product to substrate conversion is a  
216 non-enzymatic, hydrolysis type reaction, governed by a constant  $k_h$  (note that, below and in the  
217 *SI*, we relax this assumption without loss of the presented conclusions). The catalytic flux of  
218 this back reaction,  $V_{P \rightarrow S}$ , is given by  $k_h \cdot [P]$  and therefore, behaves linearly with increasing  
219  $[S_{sum}]$ . This linear relation has slope  $-k_h$  and intercept  $S_{tot}$  (Fig. 2C). When we plot  $V_{S \rightarrow P}$  and  
220  $V_{P \rightarrow S}$  against  $[S_{sum}]$  on the same plot, the intersection points represent the steady states of the  
221 reaction system, i.e. points where the product formation flux,  $V_{S \rightarrow P}$ , equals that of product loss,  
222  $V_{P \rightarrow S}$ . Using the fact that  $V_{P \rightarrow S}$  is a line with negative slope, we can see that a negative type  
223  $V_{S \rightarrow P}$  curve opens the possibility to have three intersections between  $V_{S \rightarrow P}$  and  $V_{P \rightarrow S}$ , and  
224 therefore three steady states. Three steady states are the hallmark of bistability, and indeed, for  
225 this parameter set, our model displays bistability, where different starting conditions can lead  
226 to different steady state dynamics (Fig. 2D). Since adjusting the value of  $S_{tot}$  results in shifting  
227 the  $V_{P \rightarrow S}$  line along the x-axis, we can graphically see that as long as  $k_h$  is below a certain  
228 threshold value, there will be some value of  $S_{tot}$  that ensures three intersections. In other words,  
229 tuning the  $S_{tot}$  value would allow shifting the  $V_{P \rightarrow S}$  line across the x-axis on Fig. 2C, until three  
230 intersections with the  $V_{S \rightarrow P}$  curve are obtained.

231  
232 While we analyse a system with  $n = 2$  and a sample parameter set in Fig. 2, we can use the  
233 above discussion to draw a general conclusion that will be true for any  $n$ . If  $V_{S \rightarrow P}$  is of the  
234 negative type and its slope at the inflection point is smaller than the slope of  $V_{P \rightarrow S}$  (that is  $-k_h$ ),

235 then the curves will intersect three times if the line  $V_{P \rightarrow S}$  passes through the inflection point.  
236 The slope of  $V_{S \rightarrow P}$  at the inflection point depends on  $E_{tot}$  and the reaction rate constants, while  
237 the slope of  $V_{P \rightarrow S}$  at the inflection point depends on  $k_h$ . This graphical analysis, therefore,  
238 provides an intuition about why having a  $V_{S \rightarrow P}$  of the negative type and with a slope at its  
239 inflection point smaller than  $-k_h$  provides a route to bistability in a system with a multi-site  
240 enzyme for some value of  $S_{tot}$ . On the contrary, if  $V_{S \rightarrow P}$  is of the positive type and does not  
241 display any peaks (as shown in Fig. 2B), bistability is precluded as  $V_{P \rightarrow S}$  cannot intersect  $V_{S \rightarrow P}$   
242 in more than one point. When  $V_{S \rightarrow P}$  is of the positive type and displaying a single or multiple  
243 peak, there is again the possibility for three intersection points and bistability (see *SI*, Section  
244 2.4). In summary, this graphical discussion shows that a negative type curve for  $V_{S \rightarrow P}$   
245 guarantees three steady states after appropriately choosing the other relevant parameters (e.g.  
246  $k_h$  and  $S_{tot}$ ).

247  
248 **Kinetic rate parameter conditions that guarantee multiple steady states in a reaction**  
249 **system with a multi-site enzyme.** In order to formalise and generalise the graphical  
250 considerations made above, we take a mathematical approach to determining conditions on  
251 kinetic parameters that result in multiple steady states. The idea is to identify the conditions  
252 when  $V_{S \rightarrow P}$  is of the negative type, that is, when it converges to its limiting value from above,  
253 and use these conditions to guarantee that  $V_{P \rightarrow S}$  and  $V_{S \rightarrow P}$  will intersect at multiple points.

254  
255 We find that  $V_{S \rightarrow P}$  is of the negative type exactly when the following condition holds (*SI*,  
256 Section 1.2):

257  
258 
$$\sum_{|I|=n-1} \frac{\sum_{i \in I} c_{I \setminus \{i\}, I}}{\sum_{|J|=n-1} K_J / K_I} > \sum_{i \in [n]} c_{[n] \setminus \{i\}, [n]} \quad (\text{Eq. 3})$$

259  
260 Here,  $K_I$  and  $c_{I \setminus \{i\}, I}$  represent the Michaelis Menten ( $K_m$ ) and catalytic rate constants as in Eq.  
261 1, respectively, for the enzyme complexes with all binding sites bound but the  $i$ 'th one (i.e.  
262 enzyme complexes with  $n-1$  sites bound). The term  $c_{[n] \setminus \{i\}, [n]}$  represents the catalytic rate  
263 constants of the fully-bound enzyme complex, where catalysis happens at the  $i$ -th binding site  
264 (see also Fig. 3).

265  
266 We note that the condition defined by Eq. 3 is aligned with the graphical analyses we discussed  
267 in the previous sections (Fig. 1 and 2). There, we have shown that the curve type of  $V_{S \rightarrow P}$  is  
268 determined by whether the fully-bound or non-fully-bound enzyme complexes are dominating  
269 the dynamics of catalysis. In line with these arguments, for Eq. 3 to hold and hence for  $V_{S \rightarrow P}$  to  
270 be of the negative type, the sum of the catalytic rate constants for the  $n-1$  non-fully-bound  
271 complexes, each adjusted by the contribution of that complex in the system dynamics  
272 (represented by their  $K_m$ 's), have to be greater than the sum of the catalytic rate constants of  
273 the fully-bound complex.

274  
275 Eq. 3 determines the condition for  $V_{S \rightarrow P}$  to be of the negative type. How this leads to  
276 multistability relates to the system, in which the multi-site enzyme is embedded in. We first  
277 study the simple case of a non-enzymatic back reaction from product to substrate (see next  
278 section for results of alternative reaction systems). We find that we are guaranteed to have three  
279 positive steady states in such a cyclic reaction system, for some values of  $S_{tot}$  and  $E_{tot}$ , if the  
280 reaction rate constants satisfy the following condition (*SI*, Section 2.1):

281

282 
$$\sum_{|I|=n-1} \frac{\sum_{i \in I} c_{I \setminus \{i\}, I}}{\sum_{|J|=n-1} K_J / K_I} > \left( k_h + \sum_{i \in [n]} c_{[n] \setminus \{i\}, [n]} \right) \quad (\text{Eq. 4})$$

283  
284 This condition is identical to Eq. 3, but with the extra term  $k_h$  on the right-hand side. This is  
285 again in line with our analysis above. First, if Eq. 4 holds, then Eq. 3 must also hold, and hence  
286  $V_{S \rightarrow P}$  is of negative type. Second, Eq. 4 tells us that  $k_h$  cannot be larger than a certain amount.  
287 This ensures that, with the appropriate choice of  $S_{tot}$  and  $E_{tot}$ ,  $V_{P \rightarrow S}$  passes through the last  
288 inflection point of  $V_{S \rightarrow P}$  with slope larger than the slope of  $V_{S \rightarrow P}$  at that point. As discussed, this  
289 gives rise to multiple steady states.

290  
291 **Conditions for multiple steady states exist for different reaction systems involving a**  
292 **multi-site enzyme.** Using the same approach as above, we expanded our analysis to other  
293 realistic reaction motifs featuring a multi-site enzyme. We considered two common motifs,  
294 involving an enzymatic back reaction from the product to substrate or in- and out-fluxes of  
295 both substrate and product (Fig. 3A). The former case represents two enzymes creating a cyclic  
296 reaction motif and is commonly found in metabolism and in signalling systems (2,14,15,19).  
297 The latter case represents another widely applicable scenario, where any upstream and  
298 downstream reactions can generate or consume the substrate and product. In this case, there is  
299 no assumption of total substrate amount being conserved.

300  
301 For each of the cases depicted in Figure 3A, we found that the existence of multiple steady  
302 states is guaranteed by an inequality almost identical to Eq. 4 (see *SI* sections 2.2 and 2.3). In  
303 the case of a reaction system with an enzymatic back reaction from product to substrate, the  
304 catalytic rate constant of the back reaction replaces  $k_h$  in Eq. 4. In the case of the reaction  
305 system involving fluxes of substrate and product,  $k_h$  is eliminated entirely from the inequality,  
306 that is, the inequality reduces simply to Eq. 3. These resulting inequalities need to be  
307 supplemented with a distinct choice of additional parameters. For the system with enzymatic  
308 back reaction, Eq. 4 guarantees multiple steady states after appropriately selecting  $S_{tot}$ ,  $E_{tot}$  and  
309 the conserved total amount of the enzyme catalysing the back reaction from product to substrate  
310 (*SI*, Section 2.2). For the system with fluxes, Eq. 3 guarantees multiple steady states after  
311 appropriately choosing  $E_{tot}$  and flux rate constants (*SI*, Section 2.3). So, in this case, the  
312 possibility of multiple steady states is not conditioned on the value of  $S_{tot}$  as the total amount  
313 of substrate is no longer conserved.

314  
315 The key, intuitive message, as depicted in Fig. 3B, is that a key sufficient mechanism for  
316 existence of multiple steady states is related to the dynamics of two distinct sets of enzyme  
317 complexes, those that are fully-bound and those that have one binding site empty. When the  
318 kinetics of the latter dominates over that of the former, and Eq. 3 is satisfied, a negative type  
319  $V_{S \rightarrow P}$  curve emerges from the multi-site enzyme dynamics and multiple steady states are  
320 guaranteed to exist in some parameter regime in the system.

321  
322 It is important to note that especially with increasing  $n$  many multiple steady states may arise,  
323 and not just three. We note that a formal analysis of the stability of each steady state cannot be  
324 done using the presented general framework. In the case of systems with  $n = 2$  and 3, we have  
325 sampled kinetic parameter values satisfying Eq. 4, and found that when the system displays  
326 three steady states, then bistability arises, showing that at least two steady states are stable.  
327 Finally, we also note, that Eq. 3 and 4 do not define *necessary* conditions for multiple steady  
328 states, but rather conditions that *guarantees* multiple steady states. As we argued above, there

329 can be parameter sets that lead to a positive type  $V_{S \rightarrow P}$  curve with multiple peaks and therefore  
330 still lead to multiple steady states without fulfilling Eq. 4 (SI, Section 2.4).

331  
332 **Enzyme parameters in the physiological ranges that satisfy Eq. 3 permit bistability.** As  
333 described above, Eq. 4 describe conditions on the catalytic rates and  $K_m$  constants that are  
334 guaranteed to result in multiple steady states for *some* set of  $S_{tot}$  and  $E_{tot}$  values. To identify  
335 ranges of these latter parameters, we used numerical and analytical methods with the 2-site  
336 enzyme model with a cyclic reaction motif involving a non-enzymatic back reaction as a case  
337 study (first panel of Fig. 3A). We have chosen kinetic parameters in a physiological range using  
338 available information from the literature on multi-site enzymes involved in cyclic reaction  
339 systems (see *Methods*). We then derived a bifurcation diagram for the parameters  $S_{tot}$  and  $E_{tot}$   
340 (see *Methods*). We find that for physiologically relevant kinetic parameters, there is a relatively  
341 wide range of  $S_{tot}$  and  $E_{tot}$  values allowing for multiple steady states, but  $E_{tot}$  is always much  
342 smaller than  $S_{tot}$  (Fig. 4A, red area bounded by dashed lines). In other words, the manifestation  
343 of multiple steady states in this cyclic reaction scheme happens in a regime of substrate-  
344 saturated enzymes. In fact, for this reaction system, we find that the relation  $S_{tot} > n \cdot E_{tot}$  needs  
345 to hold for systems satisfying Eq. 4 to display multiple steady states (see SI, Section 2.1).

346  
347 How would changing kinetic parameters affect the  $S_{tot}$  and  $E_{tot}$  ranges permitting multiple  
348 steady states? As discussed above,  $S_{tot}$  determines the intersection point of the  $V_{P \rightarrow S}$  line with  
349 the x-axis, while  $E_{tot}$  determines the height of the  $V_{S \rightarrow P}$  curve. We can therefore expect that  
350 kinetic parameters affecting the slope and shape of the  $V_{P \rightarrow S}$  line and the  $V_{S \rightarrow P}$  curve will alter  
351 the  $S_{tot}$  and  $E_{tot}$  ranges permitting multiple steady states. In line with this prediction, we find  
352 that decreasing  $k_h$  and increasing the catalytic rates of the non-fully-bound enzyme complexes  
353 widens the  $S_{tot}$  and  $E_{tot}$  range for multiple steady states (Fig. 4A, regions bounded by straight  
354 and dotted lines). The latter creates this effect by changing the slope of the  $V_{P \rightarrow S}$  line, while the  
355 latter by changing the height of the  $V_{S \rightarrow P}$  curve.

356  
357 In the case of the reaction system with substrate and product fluxes (Fig. 3A, left-most panel),  
358 i.e. where  $S_{tot}$  is not a constant anymore, the bistable regime is determined by enzyme kinetic  
359 parameters, substrate in- and out-flux, product out-flux, and  $E_{tot}$  (see SI section 2.3). For this  
360 case, we derived a bifurcation diagram for substrate in-flux and product out-flux rates for a  
361 given, physiologically realistic  $E_{tot}$  and found that changing  $E_{tot}$  can result in widening of the  
362 bistable regime for these two parameters (Figure 4B).

## 363 364 **METHODS**

365 **Core biochemical model.** We considered first a core model involving an enzyme with multiple  
366 substrate-binding sites, each able to convert the substrate into a product, as shown in Fig. 1.  
367 For this model we assumed that the total enzyme concentration and the total substrate  
368 concentration, that is free substrate, substrate bound to enzyme, and the product, are conserved.  
369 We relaxed the latter assumption in subsequent models that were built from this core model.  
370 For the core model, the resulting binding and catalytic reactions for an enzyme with  $n$ -binding  
371 sites is given in Eq. 1. Additional reactions in the subsequent models and involving the product,  
372 and sometimes the substrate, are considered, either as occurring with a constant rate or  
373 mediated by an additional enzyme. Our mathematical analyses consisted of writing ordinary  
374 differential equations (ODEs) for such reaction systems using mass action kinetics. The ODEs  
375 for the core, general model shown in Fig. 1, as well as the alternative models shown in Fig. 3,  
376 are provided in full in the SI along with the detailed derivations leading to Eq. 2, Eq. 3 and Eq.



377 4. As an illustration, we provide here the reaction system for the core model, for  $n = 2$ , i.e. a  
 378 two-binding-site enzyme:

379

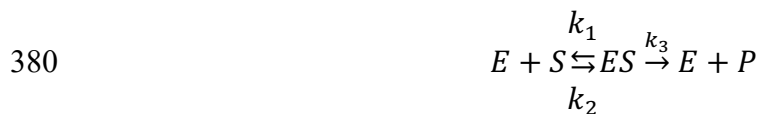

381

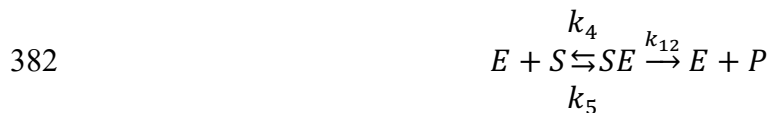

383

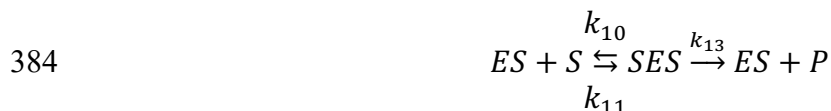

385

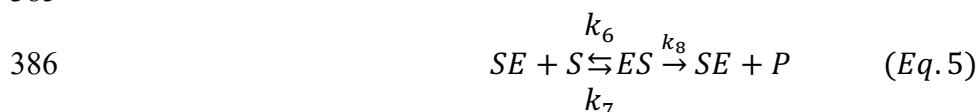

387

388 where the single- and double-bound enzyme complexes are denoted as  $ES$ ,  $SE$ , and  $SES$   
 389 respectively. The corresponding set of ODEs resulting from this reaction system can be written  
 390 using mass action kinetics for each of the reactions shown in Eq. 4, as we have done in the  
 391 provided MATLAB code (see *SI* file1). The conservation relations for this system are:

392

$$393 \quad [S_{tot}] = [S] + [ES] + [SE] + 2[SES] + [P]$$

394

$$395 \quad [E_{tot}] = [E] + [ES] + [SE] + [SES] \quad (Eq. 6)$$

396

397 **Symbolic and numerical computations.** For all symbolic computations, utilised in finding  
 398 steady state solutions and deriving mathematical conditions on rate parameters, we used the  
 399 software Maple 2020. For simulations, run to numerically analyse select systems, we again  
 400 used Maple, or the MATLAB package, with the standard solver functions.

401

402 **Bifurcation analysis and physiologically realistic kinetic parameters and  $S_{tot}$  and  $E_{tot}$**   
 403 **ranges.** To analyse if multiple steady states would be realised in physiologically realistic  
 404 parameter regimes, we used a cyclic reaction system with a two-binding site enzyme (Fig. 4A).  
 405 For such an enzyme, we have used kinetic parameter values in physiologically feasible ranges  
 406 as found in the literature and listed below (16,20,21). We then used our mathematical condition  
 407 shown in Eq. 4, and bifurcation analyses to derive the  $S_{tot}$  and  $E_{tot}$  ranges that guarantee multiple  
 408 steady states. The analysis was performed using cylindrical algebraic decomposition in Maple,  
 409 using the package RootFinding[parametric] (22). As an example, the kinetic rate values used  
 410 for Fig. 2, as listed on its legend, result in Eq. 4 to be satisfied and hence would result in  
 411 multiple steady states when combined with any combination of  $S_{tot}$  and  $E_{tot}$  that are in the  
 412 permissible range shown in Fig. 4. The literature based, physiologically realistic kinetic  
 413 parameter ranges we have considered were:  $10^7 - 10^{10} \text{ M}^{-1} \text{ min}^{-1}$  for substrate-enzyme binding,  
 414  $10^2 - 10^6 \text{ min}^{-1}$  for substrate dissociation from a substrate-enzyme complex,  $50 - 10^7 \text{ min}^{-1}$  for  
 415 catalytic rates of enzyme complexes and hydrolysis rate (i.e.  $k_h$ ), and  $10^{-6} - 10^{-2} \text{ M}$  for their  $K_M$

416 values. The literature based, physiologically realistic values of  $S_{tot}$  and  $E_{tot}$  that we considered  
417 were  $10^{-6} - 10^{-2}$  M and  $10^{-8} - 10^{-4}$  M respectively.

418

## 419 DISCUSSION

420 We have shown that multi-substrate binding enzymes have an inherent capacity to generate  
421 bistability when placed within a reaction system. Specifically, the very act of an enzyme  
422 binding two or more molecules of the same substrate is guaranteed to result in a specific  
423 nonlinear relation between substrate amount and catalytic flux rate ( $V_{S \rightarrow P}$ ) in a certain  
424 parameter regime (we called the resulting relation a negative type curve in the main text). When  
425 the multi-substrate enzyme is placed within a reaction system, this inherent dynamical feature  
426 of a negative type curve then guarantees the emergence of multiple steady states. The wider  
427 reaction systems, embedding a multi-site enzyme can involve either substrate-product-  
428 substrate cycles or systems involving open substrate and product fluxes arising.

429

430 These types of reaction systems, as well as multi-site enzymes embedded in them, are common  
431 occurrences in metabolic and signalling pathways. Dehydrogenases and kinases, for example,  
432 are commonly involved in substrate-to-product cycles (as shown in Fig. 3A), either via redox  
433 cycling or phosphorylation/dephosphorylation of substrate-product pairs. Examples include  
434 reactions involving dehydrogenases such as lactate or glutamate dehydrogenase (23), and  
435 kinase/phosphatase pairs such as those involved in the conversion of fructose-6-phosphate (24).  
436 The case with substrate and product fluxes (Fig. 3A, left panel) is a particularly generic  
437 scenario, where there is no mass conservation assumption with regards to the substrate and  
438 product, and no requirement for a cyclic reaction motif. In these different, common reaction  
439 systems, we demonstrate that a multi-site enzyme can lead to bistable dynamics. This is  
440 because the negative type  $V_{S \rightarrow P}$  curve is an inherent feature of the multi-site enzyme and  
441 therefore independent of downstream product (and substrate) conversions. Thus, any  
442 arrangement of a reaction system resulting in substrate and product conversion dynamics that  
443 is capable of intersecting a  $V_{S \rightarrow P}$  curve of a negative type three times, will result in a system  
444 capable of multiple steady states, as we show here.

445

446 To directly ascertain bistable parameter regimes, we derived here a mathematical inequality  
447 (Eq. 3) that guarantees the  $V_{S \rightarrow P}$  to be of the negative type. This inequality constitutes the core  
448 part of additional inequalities (see Eq. 4 and *SI*) that are derived for different, and common,  
449 scenarios of reaction systems embedding a multi-site enzyme, and that guarantee the existence  
450 of multiple steady states in them. A key, biochemical intuition arising from these mathematical  
451 inequalities is that bistability within a system containing a multi-site enzyme requires non-  
452 fully-bound enzyme complexes to ‘outcompete’ the fully-bound complex in terms of catalysis  
453 (or flux) from substrate to product. This relates our work to the concept of ‘substrate inhibition’,  
454 which is observed in the case of many multi-site enzymes and specifically dehydrogenases and  
455 kinases (25), and which is commonly attributed to allosteric effects (i.e. substrate binding also  
456 at a non-catalytic, regulatory site on the enzyme). In our case, we emphasize that we do not  
457 consider allosteric effects, however, we note that the dynamics we describe here would produce  
458 a similar effect as the commonly observed reduction in catalytic rate with increasing substrate  
459 concentration (i.e. substrate inhibition). Indeed, when the criteria on kinetic parameters given  
460 in Eq. 3 are fulfilled, the resulting dynamics of catalysis rate with increasing substrate  
461 concentration (as shown in Fig 2A) will be similar as seen with substrate inhibition. Whether,  
462 in the case of specific, natural enzymes displaying substrate inhibition, the fully-bound enzyme

463 complexes have indeed specifically lower catalytic rates than complexes with non-fully-bound  
464 complexes, needs to be determined through kinetics experiments.

465  
466 In addition to the presented inequalities to be satisfied, bistability also requires additional  
467 system parameters to be chosen appropriately when we consider systems with cyclic reaction  
468 motifs. We find that these additional system parameters, total substrate and enzyme  
469 concentrations, as well as kinetic rate constants of additional reactions leading to bistability,  
470 exist within physiologically feasible parameter values obtained from enzymatic studies. A key  
471 aspect that we note, in the case of cyclic system, is that total substrate levels (i.e. substrate and  
472 product combined) need to be larger than total enzyme concentration. This condition is found  
473 to be satisfied for many enzymes *in vivo* (21). In line with these findings demonstrating  
474 physiological feasibility, bistability in systems involving cyclic reaction motifs are observed  
475 when multi-site enzymes are re-constituted *in vitro*, for example using pyruvate kinase, lactate  
476 dehydrogenase, or isocitrate dehydrogenase enzymes and their corresponding partners,  
477 bistability has been demonstrated experimentally (15,23,26). In the case of systems with open  
478 substrate and product fluxes, Eq. 3 guarantees multiple steady states after appropriately  
479 choosing  $E_{tot}$  and flux rate constants. Interestingly, in this case, we find that tuning of total  
480 enzyme levels, which can be implemented with gene expression control, can widen, or limit  
481 the bistable parameter regime. Therefore, our findings of bistability and the parameter regimes  
482 it is manifested in, can be of wide relevance for the study of a large range of cellular reaction  
483 systems.

484  
485 Reaction system dynamics are implicated to possess a level of autonomous regulation (1,2).  
486 Our findings show that multi-site enzymes can indeed provide such regulation by providing  
487 reaction systems with the capability of bistability. When bistability is realised, this will  
488 manifest itself as two different steady state concentrations, among which the system can  
489 quickly switch. Multi-site enzymes can provide a simple mechanism to achieve such higher-  
490 level functions. To this end, our findings provide clear experimental routes towards generating  
491 or removing bistability in natural reaction systems or engineered enzymes through the control  
492 of kinetic parameters or expression levels with synthetic biology approaches (27). The  
493 engineering principles described here for bistability can be further extended to explore the  
494 possible sources of multistability and oscillatory dynamics, both of which are observed in  
495 models with multi-site enzymes with flux (2,14,28), through further mathematical approaches.

496  
497 **FIGURES AND FIGURE LEGENDS**

498

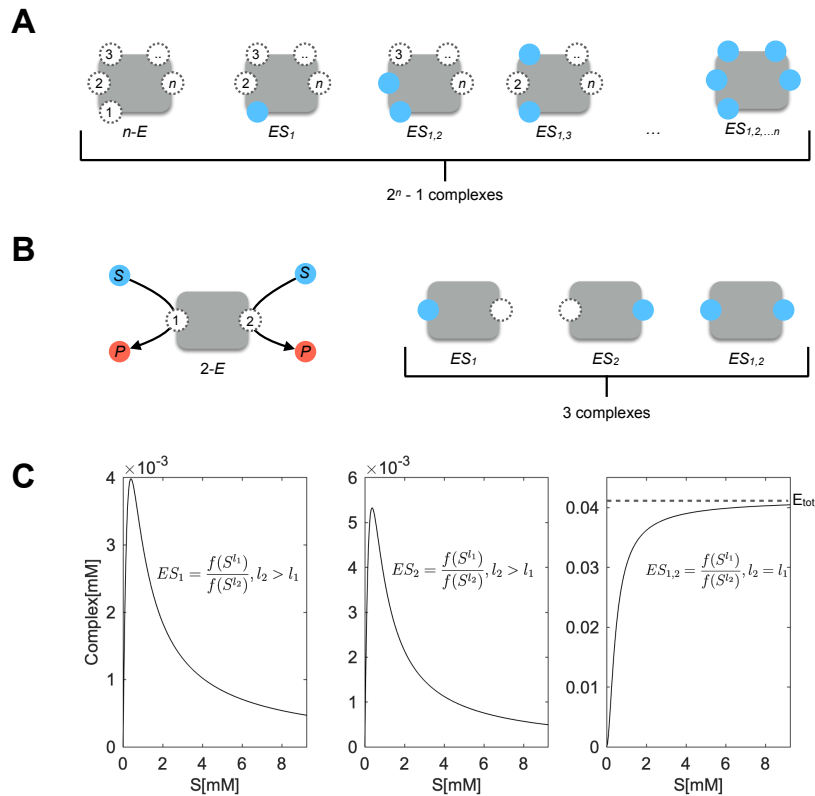

499  
500

501 **Figure 1. A.** Cartoon representation of a generic  $n$ -site model, where  $n-E$  indicates an enzyme with  $n$   
 502 substrate binding sites. The substrate binding sites are numbered in a consecutive fashion and substrate-  
 503 bound sites are shown in blue. Note that there are  $2^n - 1$  possible substrate-enzyme complexes. **B.**  
 504 Cartoon representation of a 2-site enzyme model. The substrate ( $S$ ) and product ( $P$ ) are shown in blue  
 505 and red respectively. Substrate binding is allowed in any order on each site, and both sites are assumed  
 506 to have catalytic activity. The 3 possible substrate-enzyme complexes are shown on the right. See  
 507 *Methods* for reactions and differential equations for this 2-site enzyme model. **C.** The steady state  
 508 concentration of each of the substrate-enzyme complexes with increasing concentration of substrate.  
 509 The parameters, as listed in Eq. 4, are set to the following values for these simulations;  $k_1 = k_4 = k_6 =$   
 510  $k_{10} = 10^8 \text{ M}^{-1}\text{min}^{-1}$ ,  $k_2 = k_3 = k_7 = k_{11} = 10^4 \text{ min}^{-1}$ ,  $k_3 = 10^5$ ,  $k_{12} = 1.5 \cdot 10^5 \text{ min}^{-1}$ ,  $k_8 = k_{13} = 10^3 \text{ min}^{-1}$ ,  $S_{tot}$   
 511  $= 2.31 \cdot 10^{-3} \text{ M}$ ,  $E_{tot} = 4.15 \cdot 10^{-5} \text{ M}$ . Panels from left to right show the steady state concentrations of the  
 512 two single-substrate complexes, and the fully-bound complex. A simplified version of Eq. 2, describing  
 513 the steady state concentration of the complexes is shown on each panel, highlighting the degree of the  
 514 polynomials. On the right-most panel, the dashed line indicates total enzyme concentration.

515  
516

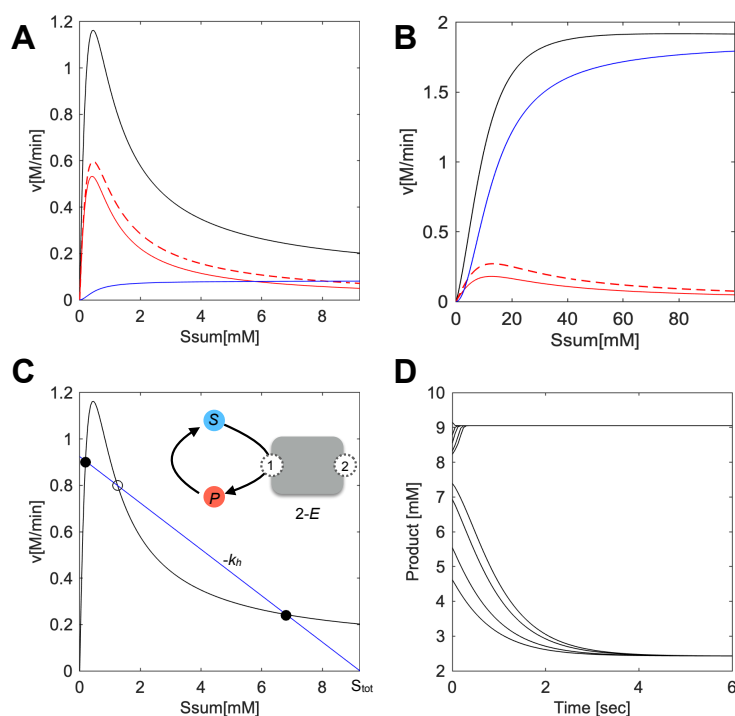

517  
 518  
 519  
 520  
 521  
 522  
 523  
 524  
 525  
 526  
 527  
 528  
 529  
 530  
 531  
 532  
 533  
 534  
 535  
 536

**Figure 2.** **A.** Steady state reaction flux through different substrate-enzyme complexes in the 2-site model against total substrate concentration. The straight and dashed red curves are for the reaction flux through the single-substrate bound complexes, while the blue curve is for the reaction flux through the fully-bound enzyme complex. The black curve shows the total reaction flux, i.e.  $V_{S \rightarrow P}$ . The parameters used are as in Fig. 1C. **B.** Steady state reaction flux through different substrate-enzyme complexes in the 2-site model against total substrate concentration. Curve shapes and colours have the same meaning as in part A. The parameters used are:  $k_1 = k_4 = k_6 = k_{10} = 10^8 \text{ M}^{-1} \text{ min}^{-1}$ ,  $k_2 = k_5 = 10^4 \text{ min}^{-1}$ ,  $k_3 = 10^5$ ,  $k_7 = k_{11} = 10^5 \text{ min}^{-1}$ ,  $k_8 = 2.5 \cdot 10^4 \text{ min}^{-1}$ ,  $k_{12} = 1.5 \cdot 10^5 \text{ min}^{-1}$ ,  $k_{13} = 2 \cdot 10^4 \text{ min}^{-1}$ ,  $S_{tot} = 2.5 \cdot 10^{-2} \text{ M}$ ,  $E_{tot} = 4.15 \cdot 10^{-5} \text{ M}$ . **C.** The 2-site enzyme embedded in a simple reaction system involving a back reaction from product to substrate, as shown on inset. The black curve shows the total reaction flux  $V_{S \rightarrow P}$ . The blue line shows the back reaction flux, i.e.  $V_{P \rightarrow S}$ . Note that the intersection points of these two curves represent the steady state points in the system. These points are marked on the plot, with stable and unstable steady states represented with filled and open circles respectively. The parameters are the same as those used in Fig. 1C A, with  $k_h = 10^2 \text{ min}^{-1}$ . **D.** Product concentration over time, resulting from a numerical simulation of the system shown in part C and using the same kinetic parameters as used there. Each curve shows the result of an individual numerical simulation, starting from a different initial condition.

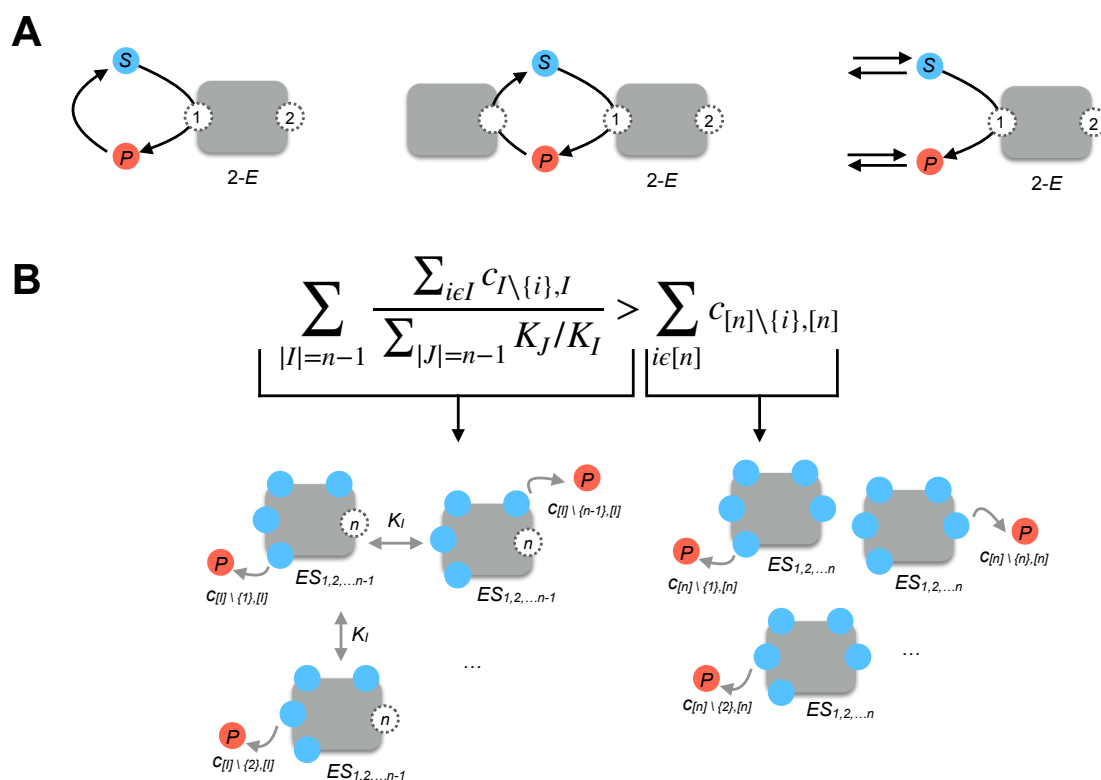

537  
538  
539  
540  
541  
542  
543  
544  
545  
546  
547  
548  
549

**Figure 3. A.** The three different reaction systems, embedding a multi-site enzyme, considered in this work. For simplicity, each system is shown with a 2-site enzyme model and with only a single reaction via one example binding site, while the mathematical analysis presented in the main text considers a  $n$ -site model with all possible binding and catalysis reactions. The resulting inequality for each 2-site system is provided under each cartoon, with the inequalities for the full model provided in the *SI*. **B.** The core inequality, as shown in Eq. 3 and common to all the cases considered, is written for the generic,  $n$ -site model. This inequality characterizes when  $V_{S \rightarrow P}$  is of negative type. We note that the right side of this equation correspond to only the sum of catalytic rates from the fully bound enzyme complex, as depicted in the cartoon below. The right side of the inequality involves both catalytic rates and equilibrium constants of those enzyme complexes that are unbound only on one site.

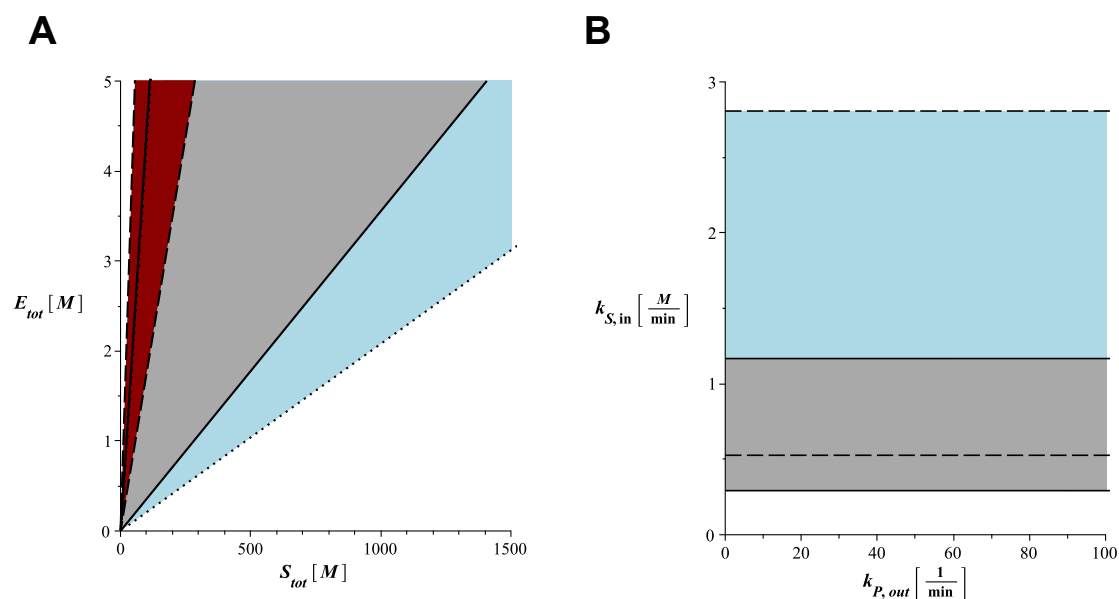

550

551 **Figure 4. A.** Two-parameter bifurcation diagram for the reaction system shown on the inset of Fig. 2C  
552 and involving a 2-site enzyme with a  $P$  to  $S$  back reaction. The diagram shows the regime with three  
553 steady states for varying  $S_{tot}$  (x-axis) and  $E_{tot}$  (y-axis) values (in M) for three different sets of  
554 physiologically relevant enzyme kinetic parameters. The kinetic parameters used for the region bounded  
555 by the dashed lines (covering all of the red area) were:  $k_1 = k_4 = k_6 = k_{10} = 10^8 \text{ M}^{-1}\text{min}^{-1}$ ,  $k_2 = k_5 = k_7 =$   
556  $k_{11} = 10^4 \text{ min}^{-1}$ ,  $k_3 = 10^5$ ,  $k_{12} = 1.5 \cdot 10^5 \text{ min}^{-1}$ ,  $k_8 = k_{13} = 10^3 \text{ min}^{-1}$ ,  $k_h = 0.5 \cdot 10^3 \text{ min}^{-1}$ . For the region  
557 bounded by the straight lines (covering all of the grey area and some of the red area), the only parameter  
558 altered was the hydrolysis rate of the product;  $k_h = 10^2 \text{ min}^{-1}$ . For the region bounded by the dotted lines  
559 (covering all the blue and grey areas, and some of the red area), the two parameters altered were the  
560 hydrolysis rate of the product and the catalytic rate of one of the single-bound complex;  $k_h = 10^2 \text{ min}^{-1}$   
561 and  $k_3 = 10^6$ . Note that the left boundary of the regions bounded by the straight and dotted lines overlap.  
562 **B.** Two-parameter bifurcation diagram for the reaction system with free substrate and product fluxes  
563 (as shown on the right most cartoon on Fig. 3A) and involving a 2-site enzyme. The diagram shows the  
564 regime with three steady states for varying substrate in-flux rate  $k_{S,in}$  (y-axis) and product out-flux rate,  
565  $k_{P,out}$  (x-axis). Parameters used were as for the straight-line case of part A, and with additional  
566 parameters set as;  $k_{S,out} = 10 \text{ min}^{-1}$ ,  $k_{P,in} = 0$  (no product in-flux). The parameter  $E_{tot}$  was set to  $4.15 \cdot 10^5$   
567 M and  $10^{-4}$  M for the areas bounded by the straight and dashed lines respectively.  
568

## 569 REFERENCES

- 570 1. U. Alon, *An introduction to systems biology: design principles of biological circuits*,  
571 Chapman & Hall/CRC mathematical and computational biology series (Chapman & Hall/CRC,  
572 Boca Raton, FL, 2007), pp. xvi, 301 p.
- 573 2. J. G. Reich, E. E. Sel'kov, *Energy metabolism of the cell: a theoretical treatise* (Academic  
574 Press, London; New York, 1981), pp. viii, 345 p.
- 575 3. A. Verdugo, P. K. Vinod, J. J. Tyson, B. Novak, Molecular mechanisms creating bistable  
576 switches at cell cycle transitions. *Open Biol* **3**, 120179 (2013).
- 577 4. O. Kobiler *et al.*, Quantitative kinetic analysis of the bacteriophage lambda genetic network.  
578 *Proc Natl Acad Sci U S A* **102**, 4470-4475 (2005).
- 579 5. O. Kotte, B. Volkmer, J. L. Radzikowski, M. Heinemann, Phenotypic bistability in  
580 *Escherichia coli*'s central carbon metabolism. *Mol Syst Biol* **10**, 736 (2014).
- 581 6. E. M. Ozbudak, M. Thattai, H. N. Lim, B. I. Shraiman, A. Van Oudenaarden, Multistability  
582 in the lactose utilization network of *Escherichia coli*. *Nature* **427**, 737-740 (2004).
- 583 7. J. H. van Heerden *et al.*, Lost in transition: start-up of glycolysis yields subpopulations of  
584 nongrowing cells. *Science* **343**, 1245114 (2014).
- 585 8. N. Q. Balaban, J. Merrin, R. Chait, L. Kowalik, S. Leibler, Bacterial persistence as a  
586 phenotypic switch. *Science* **305**, 1622-1625 (2004).
- 587 9. F. Jacob, J. Monod, Genetic regulatory mechanisms in the synthesis of proteins. *J Mol Biol*  
588 **3**, 318-356 (1961).
- 589 10. Thomas R. "On the Relation Between the Logical Structure of Systems and Their Ability  
590 to Generate Multiple Steady States or Sustained Oscillations" in Numerical Methods in the  
591 Study of Critical Phenomena, Eds. J. Della Dora, J. Demongeot, B. Lacolle (Springer Series in  
592 Synergetics, vol 9. Springer, Berlin, Heidelberg, 1981).
- 593 11. P. Glansdorff, I. Prigogine, *Thermodynamic theory of structure, stability and fluctuations*  
594 (Wiley-Interscience, London, New York, 1971), pp. xxiii, 306 p.
- 595 12. E. Feliu, C. Wiuf, Enzyme-sharing as a cause of multi-stationarity in signalling systems. *J*  
596 *R Soc Interface* **9**, 1224-1232 (2012).
- 597 13. S. Feng, M. Saez, C. Wiuf, E. Feliu, O. S. Soyer, Core signalling motif displaying  
598 multistability through multi-state enzymes. *J R Soc Interface* **13** (2016).

- 599 14. J. Hervagault, A. Cimino, Dynamic behaviors of an open substrate cycle: A graphical  
600 approach. *J. Theor. Biol.* **140**, 399-416 (1989).
- 601 15. G. Guidi, M. Carrier, A. Goldbeter, Bistability in the isocitrate dehydrogenase reaction: An  
602 experimentally based theoretical study. *Biophysical Journal* **74**, 1229-1240 (1998).
- 603 16. A. Fersht, *Structure and mechanism in protein science: a guide to enzyme catalysis and*  
604 *protein folding* (W.H. Freeman, New York, 1999).
- 605 17. G. A. Grant, D. J. Schuller, L. J. Banaszak, A model for the regulation of D-3-  
606 phosphoglycerate dehydrogenase, a Vmax-type allosteric enzyme. *Protein Sci* **5** (1996).
- 607 18. A. W. Fenton, G. D. Reinhard, Mechanism of substrate inhibition in *Escherichia coli*  
608 phosphofructokinase. *Biochemistry* **42** (2003).
- 609 19. J. H. Hofmeyr, H. Kacser, K. J. van der Merwe, Metabolic control analysis of moiety-  
610 conserved cycles. *Eur J Biochem* **155**, 631-641 (1986).
- 611 20. B. D. Bennett *et al.*, Absolute metabolite concentrations and implied enzyme active site  
612 occupancy in *Escherichia coli*. *Nat Chem Biol* **5**, 593-599 (2009).
- 613 21. K. R. Albe, M. H. Butler, B. E. Wright, Cellular concentrations of enzymes and their  
614 substrates. *J Theor Biol* **143**, 163-195 (1990).
- 615 22. S. Liang, J. Gerhard, D. J. Jeffrey, G. Moroz, A Package for Solving Parametric Polynomial  
616 Systems. *ACM Comm. in Computer Algebra*, **43:3**, 61 - 72 (2009).
- 617 23. E. Simonet, C. Bourdillon, J. Hervagault, Bistability in coupled open substrate cycles:  
618 Numerical and experimental approaches. *J.Phys. Chem.* **100** (1996).
- 619 24. B. C. Mulukutla, A. Yongky, P. Daoutidis, W. S. Hu, Bistability in glycolysis pathway as  
620 a physiological switch in energy metabolism. *PLoS One* **9**, e98756 (2014).
- 621 25. M. C. Reed, A. Lieb, H. F. Nijhout, The biological significance of substrate inhibition: a  
622 mechanism with diverse functions. *Bioessays* **32**, 422-429 (2010).
- 623 26. A. Cimino, J. Hervagault, Irreversible transitions in a model substrate cycle: An  
624 experimental illustration. *FEBS Lett* **263** (1990).
- 625 27. W. J. Holtz, J. D. Keasling, Engineering static and dynamic control of synthetic pathways.  
626 *Cell* **140**, 19-23 (2010).
- 627 28. I. Prigogine, R. Lefever, A. Goldbeter, M. Herschkowitz-Kaufman, Symmetry breaking  
628 instabilities in biological systems. *Nature* **223**, 913-916 (1969).
- 629
